# Supplementary material for: Luminescent CePO4:Tb colloids for H2O2and glucose sensing
Source: Royal Society of Chemistry journal article supplement (doi:10.1039/c4an00952e), 2014-06-11
Supplement: c4an00952e1.pdf [file c4an00952e1.pdf]

## Electronic Supplementary Information

---

### **Luminescent CePO<sub>4</sub>:Tb colloids for H<sub>2</sub>O<sub>2</sub> and glucose sensing**

Changjian Lv, Weihua Di\*, Zhihe Liu, Kezhi Zheng, and Weiping Qin\*

State Key Laboratory on Integrated Optoelectronics, College of Electronic Science and Engineering, Jilin University, Changchun 130012, People's Republic of China.

E-mail: [whdi@jlu.edu.cn](mailto:whdi@jlu.edu.cn) (W. Di); [wpqin@jlu.edu.cn](mailto:wpqin@jlu.edu.cn) (W. Qin) Tel: 86-431-85168240-8325,

Fax: 86-431-85168240-8325

---

\* Corresponding authors: 2699 Qianjin Street, Changchun 130012, China. E-mail: [whdi@jlu.edu.cn](mailto:whdi@jlu.edu.cn) (W. Di); [wpqin@jlu.edu.cn](mailto:wpqin@jlu.edu.cn) (W. Qin) Tel: 86-431-85168240-8325, Fax: 86-431-85168240-8325

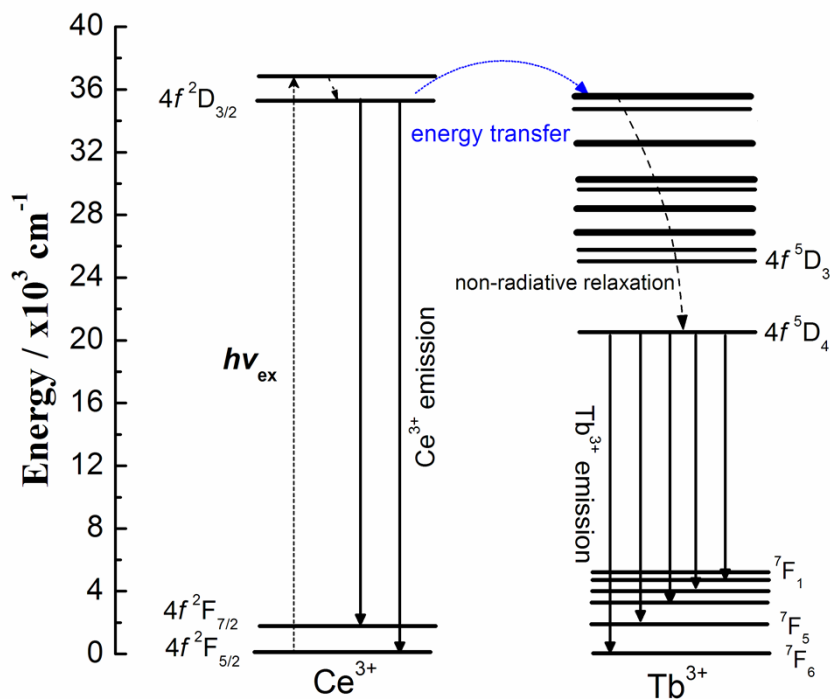

**Fig. S1** schematic image for the energy level of Ce<sup>3+</sup> and Tb<sup>3+</sup> with optical transitions, and the energy transfer processes Ce<sup>3+</sup> to Tb<sup>3+</sup>.

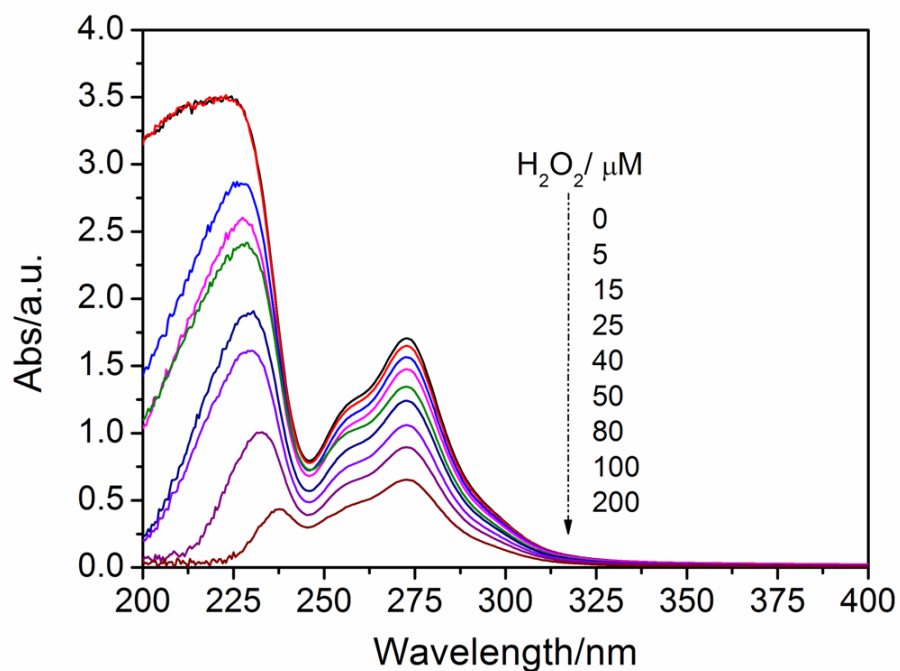

**Fig. S2** UV-vis absorption spectra recorded for the as-synthesized CePO<sub>4</sub>:Tb and for CePO<sub>4</sub>:Tb samples with treatment of various concentrations of H<sub>2</sub>O<sub>2</sub>.

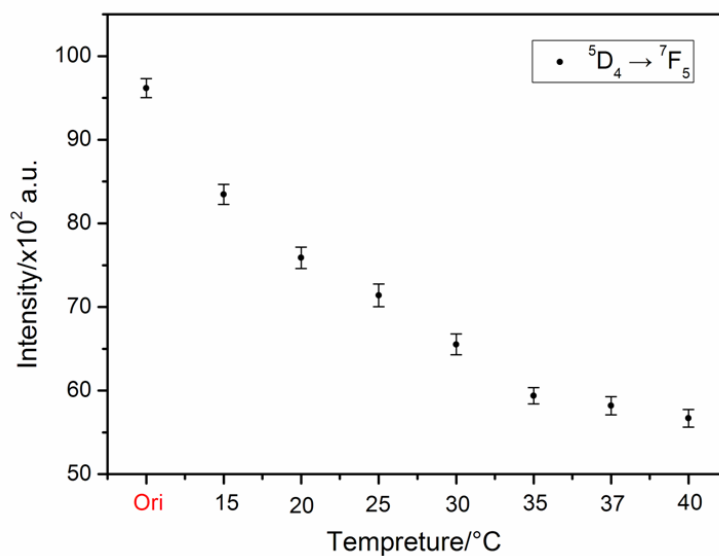

**Fig. S3** The temperature-dependent catalytic activity of GOx was examined by recording the emission spectra of CePO<sub>4</sub>:Tb as a function of temperature in the presence of glucose and GOx. We choose the Tb<sup>3+</sup> <sup>5</sup>D<sub>4</sub>-<sup>7</sup>F<sub>5</sub> emission for comparison.

We can see that the emission intensity of <sup>5</sup>D<sub>4</sub>-<sup>7</sup>F<sub>5</sub> decreases with the increase of temperature up to 37 °C, and keep almost constant while temperature was further increased. Thus, 37 °C was taken as the optimal reaction temperature.
